# Supplementary material
Source: PubMed Central journal article supplement (PMC2856305)
Supplement: supp_M109.083048_jbc.M109.083048-1.pdf [file supp_M109.083048_jbc.M109.083048-1.pdf]

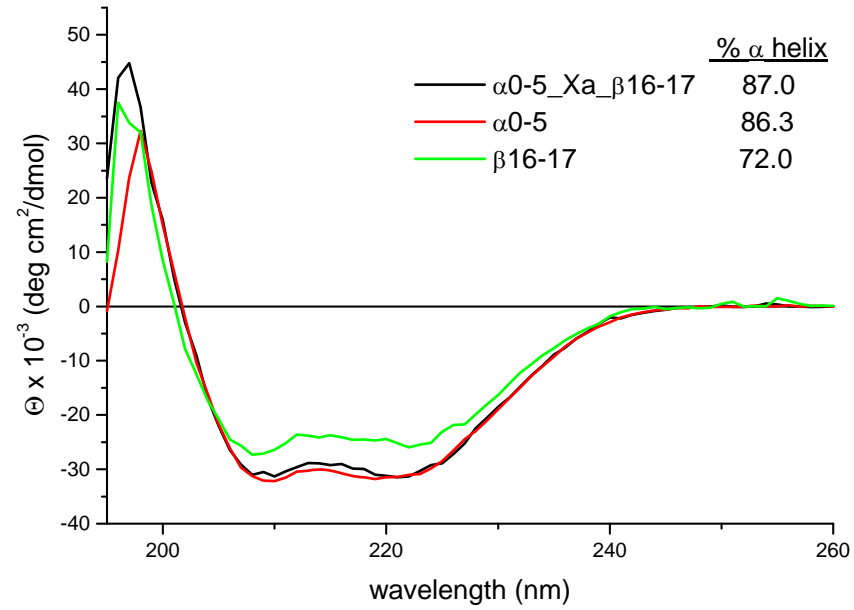

**Supplemental Figure 1. Circular dichroism results for the mini-spectrin tetramer.** A Circular dichroism results for the mini-spectrin dimer,  $\alpha$ 0-5 and  $\beta$ 16-17 in 10 mM MOPS, 130 mM NaCl, 1 mM TCEP pH 7.4 at 25 °C are shown.

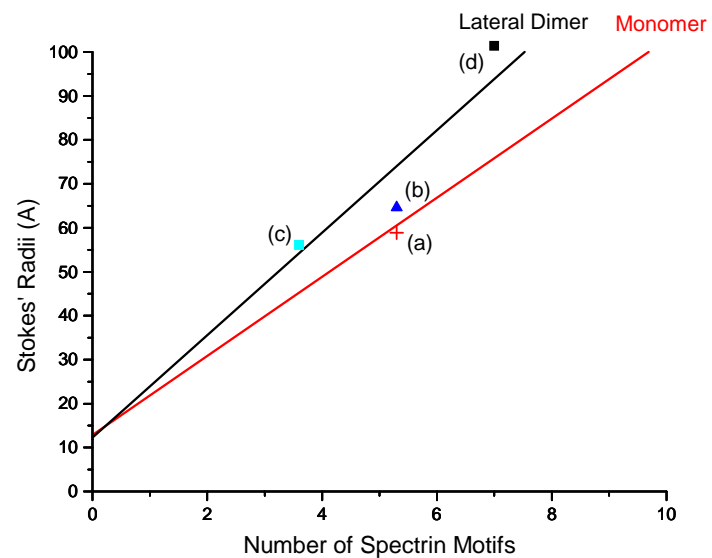

**Supplemental Figure 2. Relationship between Stokes' radii and the number of spectrin repeats.** Monomeric spectrin recombinants with different numbers of repeats were used to create a standard curve for number of repeats versus Stokes' radii (red line). Several two-stranded dimeric spectrin recombinant protein complexes were used to create a similar standard curve for two-stranded, laterally associated spectrin complexes (black line). The locations of the various mini-spectrin species are plotted for comparison based upon the number of two-strand or single-strand (monomer) repeats in the model: (a)  $\alpha$ 0-5, (b) open dimer, (c) closed dimer, (d) tetramer.

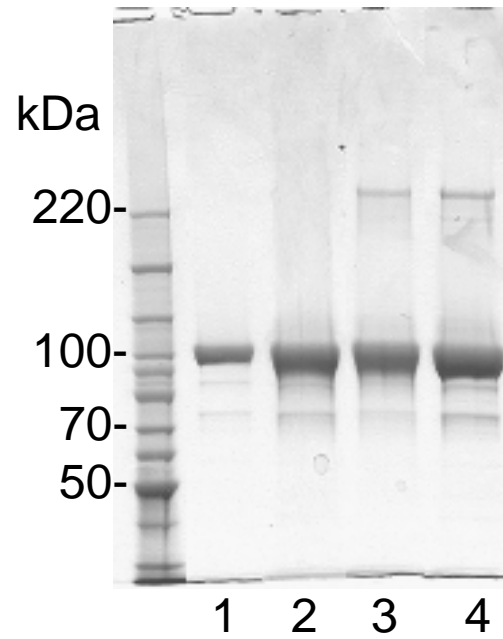

**Supplemental Figure 3. SDS-PAGE gel of cross-linked mini-spectrin dimer.** Mini-spectrin dimer was cross-linked using EDC and sulfo-NHS at a concentration of 10 mM and 5 mM, respectively. The reaction mixtures were incubated at 4 °C, and 100  $\mu$ l aliquots were removed after 1h, 2h, and 4h. *Lane 1*, non-cross-linked control. *Lane 2*, 1 h reaction. *Lane 3*, 2 h reaction. *Lane 4*, 4 h reaction.

**Supplemental Figure 4. MS/MS spectra of intra-molecular cross-linked peptides supporting an open dimer conformation: DAD\*D\*LGK and YQSFKR\*ER with precursor m/z 557.9376 and a charge state of +3.** See Supplemental Table 1 for the MS/MS assignments. Most ion assignments were from GPMAW and Fuzzy Ions.

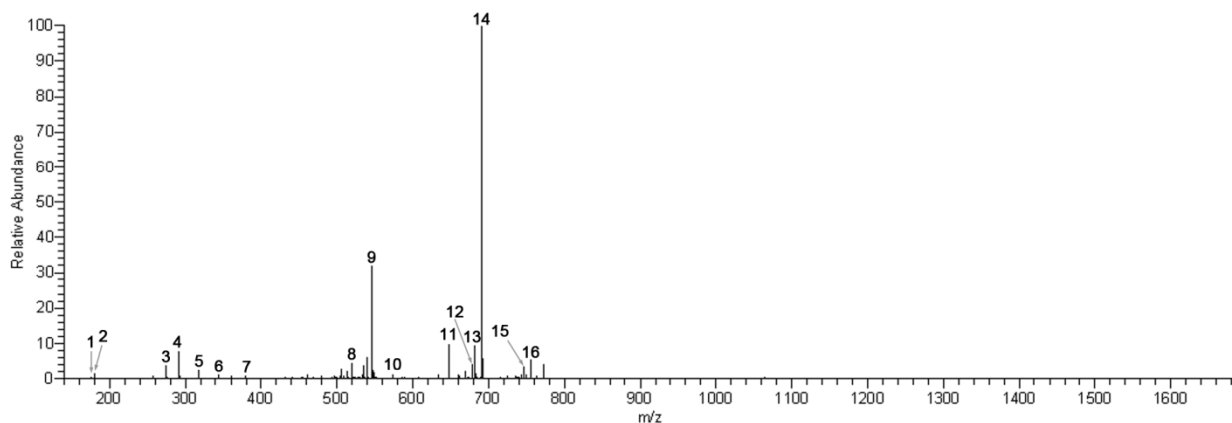

**Supplemental Table 1 MS/MS assignments for cross-linked peptide : DAD\*D\*LGK and YQSFKR\*ER.**  
The MS/MS spectra is shown in Supplemental Fig 4.

| No. | Peaks  | Assignments                                        | No. | Peaks  | Assignments                                                         |
|-----|--------|----------------------------------------------------|-----|--------|---------------------------------------------------------------------|
| 1   | 175.22 | y1 <sub>A</sub>                                    | 9   | 546.50 | MH <sub>3</sub> <sup>+3</sup> -2NH <sub>3</sub>                     |
| 2   | 181.09 | (b3 <sub>A</sub> ) <sup>+2</sup> -H <sub>2</sub> O | 10  | 573.72 | (y3 <sub>A</sub> ) <sup>+2</sup>                                    |
| 3   | 274.99 | b2 <sub>A</sub> -NH <sub>3</sub>                   | 11  | 647.63 | (y4 <sub>A</sub> B <sub>int</sub> ) <sup>+2</sup>                   |
| 4   | 292.11 | b2 <sub>A</sub>                                    | 12  | 678.48 | (A <sub>int</sub> b4 <sub>B</sub> ) <sup>+2</sup>                   |
| 5   | 317.36 | y3 <sub>B</sub>                                    | 13  | 682.12 | (y5 <sub>A</sub> B <sub>int</sub> ) <sup>+2</sup> -H <sub>2</sub> O |
| 6   | 361.09 | b3 <sub>A</sub> -H <sub>2</sub> O                  | 14  | 691.05 | (y5 <sub>A</sub> B <sub>int</sub> ) <sup>+2</sup>                   |
| 7   | 379.19 | b3 <sub>A</sub>                                    | 15  | 749.76 | (b6 <sub>A</sub> B <sub>int</sub> ) <sup>+2</sup>                   |
| 8   | 519.81 | (A <sub>int</sub> y6 <sub>B</sub> ) <sup>+3</sup>  | 16  | 755.13 | (y6 <sub>A</sub> B <sub>int</sub> ) <sup>+2</sup>                   |

**Supplemental Figure 5. MS/MS spectra of intra-molecular cross-linked peptides supporting an open dimer conformation: FQQYVQEC@ADILE\*WIGDK and G\*SMEQFPK with a precursor mass of 1049.4920 and a charge state of +3.** See Supplemental Table 2 for the MS/MS assignments. Most ion assignments were made from GPMW and Fuzzy Ions.

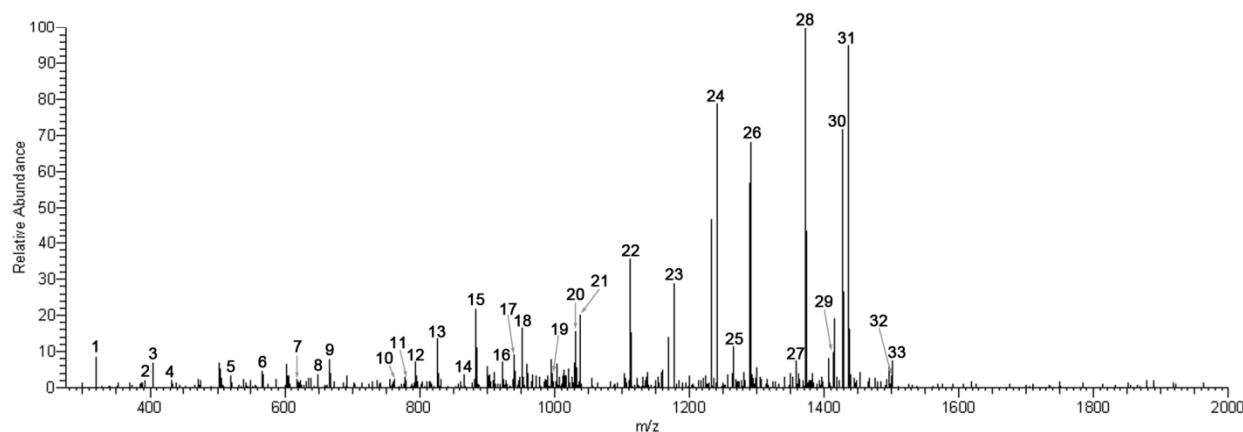

**Supplemental Table 2 MS/MS assignments for cross-linked peptide: FQQYVQEC@ADILE\*WIGDK and G\*SMEQFPK .** The MS/MS spectra is shown in Supplemental Fig 5.

| No. | Peaks  | Assignments                                       | No. | Peaks   | Assignments                                                                                           |
|-----|--------|---------------------------------------------------|-----|---------|-------------------------------------------------------------------------------------------------------|
| 1   | 319.16 | y3 <sub>A</sub>                                   | 18  | 951.95  | (b16 <sub>A</sub> B <sub>int</sub> ) <sup>+3</sup> -2NH <sub>3</sub>                                  |
| 2   | 391.29 | y3 <sub>B</sub>                                   | 19  | 997.75  | (y9 <sub>A</sub> B <sub>int</sub> ) <sup>+2</sup>                                                     |
| 3   | 404.15 | b3 <sub>A</sub>                                   | 20  | 1032.43 | (y10 <sub>A</sub> B <sub>int</sub> ) <sup>+2</sup>                                                    |
| 4   | 432.34 | y4 <sub>A</sub>                                   | 21  | 1038.57 | MH <sub>3</sub> <sup>+3</sup> -2NH <sub>3</sub>                                                       |
| 5   | 520.14 | y4 <sub>B</sub>                                   | 22  | 1112.59 | (y11 <sub>A</sub> B <sub>int</sub> ) <sup>+2</sup>                                                    |
| 6   | 566.91 | b4 <sub>A</sub>                                   | 23  | 1177.09 | (y12 <sub>A</sub> B <sub>int</sub> ) <sup>+2</sup>                                                    |
| 7   | 618.39 | y5 <sub>A</sub>                                   | 24  | 1241.14 | (y13 <sub>A</sub> B <sub>int</sub> ) <sup>+2</sup>                                                    |
| 8   | 648.39 | y5 <sub>B</sub>                                   | 25  | 1265.46 | (b13 <sub>A</sub> B <sub>int</sub> ) <sup>+2</sup>                                                    |
| 9   | 666.24 | b5 <sub>A</sub>                                   | 26  | 1291.29 | (y14 <sub>A</sub> B <sub>int</sub> ) <sup>+2</sup>                                                    |
| 10  | 761.91 | (A <sub>int</sub> b1 <sub>B</sub> ) <sup>+3</sup> | 27  | 1358.28 | (b14 <sub>A</sub> B <sub>int</sub> ) <sup>+2</sup>                                                    |
| 11  | 779.33 | y6 <sub>B</sub>                                   | 28  | 1372.42 | (y15 <sub>A</sub> B <sub>int</sub> ) <sup>+2</sup>                                                    |
| 12  | 794.45 | b6 <sub>A</sub>                                   | 29  | 1414.73 | (b15 <sub>A</sub> B <sub>int</sub> ) <sup>+2</sup>                                                    |
| 13  | 826.56 | (y6 <sub>A</sub> B <sub>int</sub> ) <sup>+2</sup> | 30  | 1427.95 | (y16 <sub>A</sub> B <sub>int</sub> ) <sup>+2</sup> -H <sub>2</sub> O                                  |
| 14  | 866.40 | y7 <sub>B</sub>                                   | 31  | 1437.00 | (y16 <sub>A</sub> B <sub>int</sub> ) <sup>+2</sup>                                                    |
| 15  | 883.18 | (y7 <sub>A</sub> B <sub>int</sub> ) <sup>+2</sup> | 32  | 1499.76 | (y17 <sub>A</sub> B <sub>int</sub> ) <sup>+2</sup>                                                    |
| 16  | 923.33 | b7 <sub>A</sub>                                   | 33  | 1501.00 | (b17 <sub>A</sub> B <sub>int</sub> ) <sup>+2</sup> /(A <sub>int</sub> b7 <sub>B</sub> ) <sup>+2</sup> |
| 17  | 939.50 | (y8 <sub>A</sub> B <sub>int</sub> ) <sup>+2</sup> |     |         |                                                                                                       |

**Supplemental Figure 6. MS/MS spectra of intra-molecular cross-linked peptides supporting an open dimer conformation: VNILTDK\*SYEDPTNIQ GK and VLETAE\*EIQR with a precursor mass of 833.9279 and a charge state of +4.** See Supplemental Table 3 for the MS/MS assignments. Most ion assignments were made from GPMW and Fuzzy Ions.

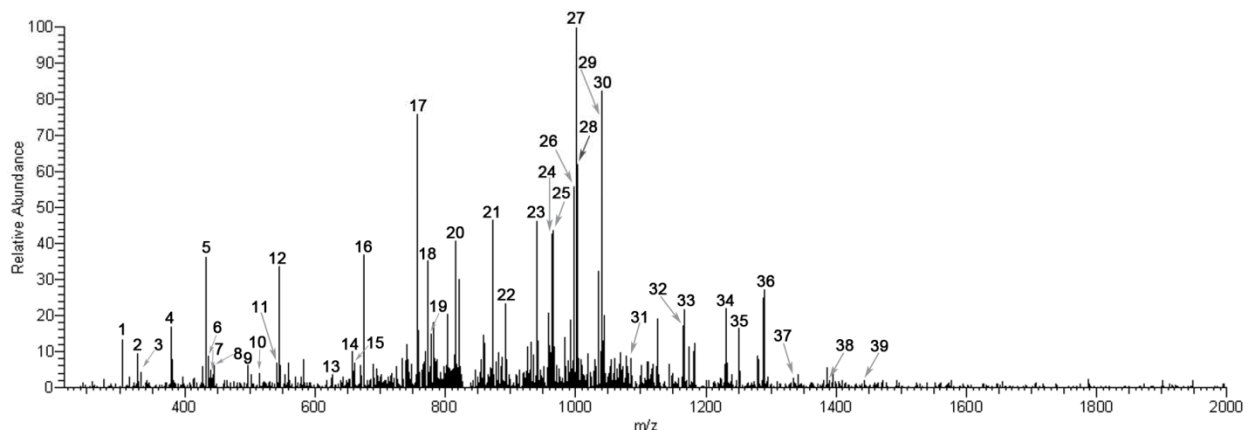

**Supplemental Table 3 MS/MS assignments for cross-linked peptide VNILTDK\*SYEDPTNIQ GK and VLETAE\*EIQR .** The MS/MS spectra is shown in Supplemental Fig 6.

| No. | Peaks  | Assignments                                                          | No. | Peaks   | Assignments                                                         |
|-----|--------|----------------------------------------------------------------------|-----|---------|---------------------------------------------------------------------|
| 1   | 304.28 | y <sub>2B</sub>                                                      | 21  | 872.33  | y <sub>8A</sub>                                                     |
| 2   | 327.28 | b <sub>3A</sub>                                                      | 22  | 893.30  | (y <sub>12A</sub> B <sub>int</sub> ) <sup>+3</sup>                  |
| 3   | 332.19 | y <sub>3A</sub>                                                      | 23  | 940.67  | (A <sub>int</sub> y <sub>6B</sub> ) <sup>+3</sup>                   |
| 4   | 379.26 | (y <sub>7A</sub> ) <sup>+2</sup>                                     | 24  | 964.44  | (A <sub>int</sub> y <sub>7B</sub> ) <sup>+3</sup>                   |
| 5   | 432.19 | b <sub>3B</sub> /y <sub>3B</sub>                                     | 25  | 965.46  | (y <sub>14A</sub> B <sub>int</sub> ) <sup>+3</sup>                  |
| 6   | 436.77 | (y <sub>8A</sub> ) <sup>+2</sup>                                     | 26  | 998.20  | (A <sub>int</sub> y <sub>8B</sub> ) <sup>+3</sup>                   |
| 7   | 440.01 | b <sub>4A</sub>                                                      | 27  | 1001.46 | y <sub>9A</sub> /(b <sub>15A</sub> B <sub>int</sub> ) <sup>+3</sup> |
| 8   | 445.25 | y <sub>4A</sub>                                                      | 28  | 1002.65 | (y <sub>15A</sub> B <sub>int</sub> ) <sup>+3</sup>                  |
| 9   | 496.19 | b <sub>5B</sub> -H <sub>2</sub> O                                    | 29  | 1040.75 | (A <sub>int</sub> y <sub>9B</sub> ) <sup>+3</sup>                   |
| 10  | 514.30 | b <sub>5B</sub>                                                      | 30  | 1041.36 | (b <sub>7A</sub> B <sub>int</sub> ) <sup>+2</sup>                   |
| 11  | 541.23 | b <sub>5A</sub>                                                      | 31  | 1085.75 | (b <sub>8A</sub> B <sub>int</sub> ) <sup>+2</sup>                   |
| 12  | 545.38 | y <sub>4B</sub>                                                      | 32  | 1164.53 | y <sub>10A</sub>                                                    |
| 13  | 626.63 | y <sub>11A</sub>                                                     | 33  | 1166.47 | (b <sub>9A</sub> B <sub>int</sub> ) <sup>+2</sup>                   |
| 14  | 656.30 | b <sub>6A</sub>                                                      | 34  | 1231.28 | (b <sub>10A</sub> B <sub>int</sub> ) <sup>+2</sup>                  |
| 15  | 660.43 | y <sub>6A</sub>                                                      | 35  | 1251.47 | y <sub>11A</sub>                                                    |
| 16  | 674.35 | y <sub>5B</sub>                                                      | 36  | 1289.06 | (b <sub>11A</sub> B <sub>int</sub> ) <sup>+2</sup>                  |
| 17  | 757.30 | y <sub>7A</sub>                                                      | 37  | 1337.74 | (b <sub>12A</sub> B <sub>int</sub> ) <sup>+2</sup>                  |
| 18  | 772.11 | (A <sub>int</sub> y <sub>9B</sub> ) <sup>+4</sup> -2H <sub>2</sub> O | 38  | 1387.75 | (b <sub>13A</sub> B <sub>int</sub> ) <sup>+2</sup>                  |
| 19  | 778.01 | (b <sub>9A</sub> B <sub>int</sub> ) <sup>+3</sup>                    | 39  | 1444.92 | (b <sub>14A</sub> B <sub>int</sub> ) <sup>+2</sup>                  |
| 20  | 815.25 | (b <sub>10A</sub> B <sub>int</sub> ) <sup>+3</sup> -NH <sub>3</sub>  |     |         |                                                                     |

**Supplemental Figure 7. MS/MS spectra of intra-molecular cross-linked peptides supporting an open dimer conformation: G\*SMEQFPK and VVEVNQYANEC@AEE\*NHPDLPLIQSK with a precursor mass of 950.9517 and a charge state of +4. See Supplemental Table 4 for the MS/MS assignments. Most ion assignments were made from GPMAW and Fuzzy Ions.**

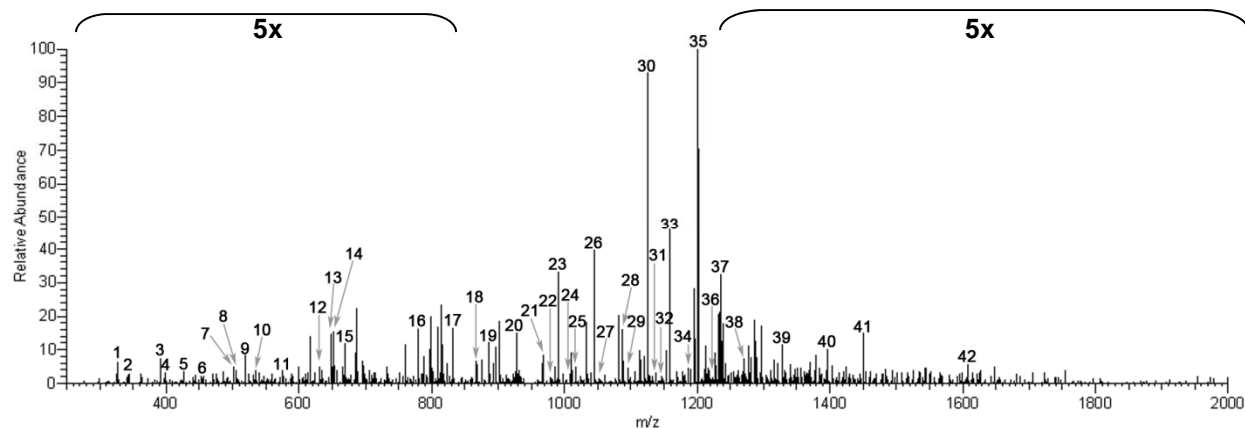

**Supplemental Table 4. MS/MS assignments for cross-linked peptide G\*SMEQFPK and VVEVNQYANEC@AEE\*NHPDLPLIQSK . The MS/MS spectra is shown in Supplemental Fig 7.**

| No. | Peaks  | Assignments                 | No. | Peaks   | Assignments                  |
|-----|--------|-----------------------------|-----|---------|------------------------------|
| 1   | 327.92 | $b3_A$                      | 22  | 979.39  | $(A_{int}b1_B)^{+3}$         |
| 2   | 343.66 | $(y6_A)^{+2}$               | 23  | 990.72  | $(y18_A B_{int})^{+3}$       |
| 3   | 391.39 | $(y7_A)^{+2}-NH_3/y3_B$     | 24  | 1008.46 | $(A_{int}b2_B)^{+3}$         |
| 4   | 399.06 | $(y7_A)^{+2}$               | 25  | 1017.28 | $b9_A$                       |
| 5   | 427.26 | $b1_A$                      | 26  | 1045.10 | $(y19_A B_{int})^{+3}$       |
| 6   | 457.20 | $(y8_A)^{+2}$               | 27  | 1052.83 | $(A_{int}b3_B)^{+3}$         |
| 7   | 502.35 | $(b13_A)^{+2}$              | 28  | 1087.69 | $(y20_A B_{int})^{+3}$       |
| 8   | 506.06 | $y9_A$                      | 29  | 1095.23 | $(A_{int}b4_B)^{+3}$         |
| 9   | 519.45 | $y4_B$                      | 30  | 1126.19 | $(y21_A B_{int})^{+3}$       |
| 10  | 541.14 | $b5_A$                      | 31  | 1137.68 | $(A_{int}b5_B)^{+3}$         |
| 11  | 574.68 | $y10_A$                     | 32  | 1148.22 | $(y12_A B_{int})^{+2}$       |
| 12  | 631.34 | $(y11_A)^{+2}$              | 33  | 1159.36 | $(y22_A B_{int})^{+3}$       |
| 13  | 648.52 | $y5_B$                      | 34  | 1186.69 | $(A_{int}b6_B)^{+3}$         |
| 14  | 652.40 | $b6_A-NH_3$                 | 35  | 1201.81 | $(y23_A B_{int})^{+3}$       |
| 15  | 669.37 | $b6_A$                      | 36  | 1219.09 | $(A_{int}b7_B)^{+3}$         |
| 16  | 779.42 | $y6_B$                      | 37  | 1236.66 | $(b14_A B_{int})^{+2}-4NH_3$ |
| 17  | 832.56 | $(y14_A B_{int})^{+3}/b7_A$ | 38  | 1271.15 | $(b14_A B_{int})^{+2}$       |
| 18  | 866.37 | $y7_B$                      | 39  | 1327.76 | $(b15_A B_{int})^{+2}$       |
| 19  | 886.23 | $(y15_A B_{int})^{+3}$      | 40  | 1396.63 | $(b16_A B_{int})^{+2}$       |
| 20  | 929.04 | $(y16_A B_{int})^{+3}$      | 41  | 1450.68 | $(A_{int}b1_B)^{+2}-2H_2O$   |
| 21  | 967.64 | $(y17_A B_{int})^{+3}$      | 42  | 1607.40 | $(b20_A B_{int})^{+2}$       |

**Supplemental Figure 8. MS/MS spectra of intra-molecular cross-linked peptides supporting a closed dimer conformation: G\*SMEQFPK and TAAINAD\*E\*LPTDVAGGEVLLDR with a precursor mass of 1048.8553 and a charge state of +3. See Supplemental Table 5 for the MS/MS assignments. Most ion assignments were made from GPMW and Fuzzy Ions.**

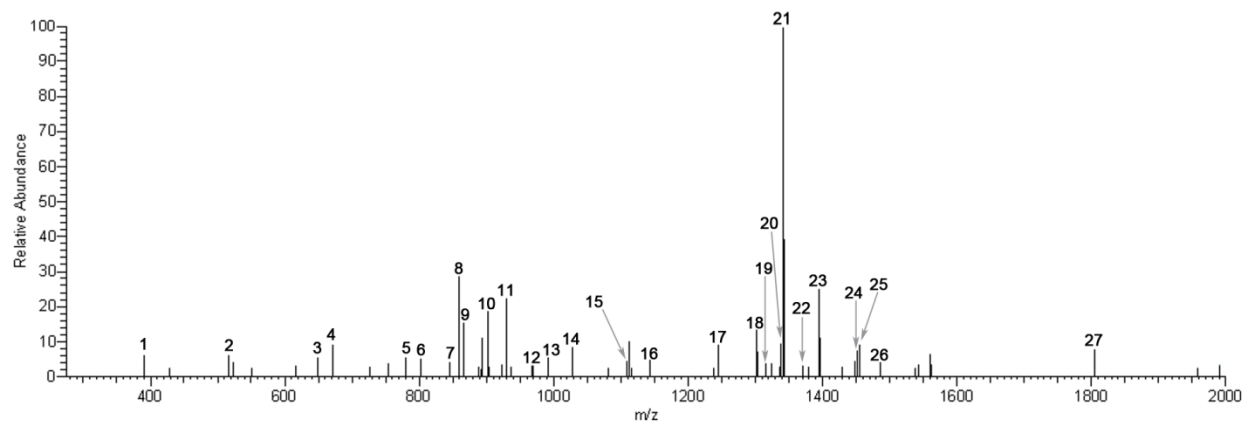

**Supplemental Table 5. MS/MS assignments for cross-linked peptide G\*SMEQFPK and TAAINAD\*E\*LPTDVAGGEVLLDR. The MS/MS spectra is shown in Supplemental Fig 8.**

| No. | Peaks   | Assignments                                        | No. | Peaks   | Assignments                                        |
|-----|---------|----------------------------------------------------|-----|---------|----------------------------------------------------|
| 1   | 391.24  | y3 <sub>B</sub>                                    | 15  | 1108.53 | (b13 <sub>A</sub> B <sub>int</sub> ) <sup>+2</sup> |
| 2   | 516.32  | y4 <sub>A</sub>                                    | 16  | 1144.05 | (b14 <sub>A</sub> B <sub>int</sub> ) <sup>+2</sup> |
| 3   | 648.34  | y5 <sub>B</sub>                                    | 17  | 1244.64 | y12 <sub>A</sub>                                   |
| 4   | 671.36  | (y13 <sub>A</sub> ) <sup>+2</sup>                  | 18  | 1302.13 | (y16 <sub>A</sub> B <sub>int</sub> ) <sup>+2</sup> |
| 5   | 779.38  | y6 <sub>B</sub>                                    | 19  | 1315.13 | (b18 <sub>A</sub> B <sub>int</sub> ) <sup>+2</sup> |
| 6   | 801.44  | y7 <sub>A</sub>                                    | 20  | 1337.66 | (y17 <sub>A</sub> B <sub>int</sub> ) <sup>+2</sup> |
| 7   | 845.90  | (b8 <sub>A</sub> B <sub>int</sub> ) <sup>+2</sup>  | 21  | 1341.71 | y13 <sub>A</sub>                                   |
| 8   | 858.47  | y8 <sub>A</sub>                                    | 22  | 1371.66 | (b19 <sub>A</sub> B <sub>int</sub> ) <sup>+2</sup> |
| 9   | 866.41  | y7 <sub>B</sub>                                    | 23  | 1394.68 | (y18 <sub>A</sub> B <sub>int</sub> ) <sup>+2</sup> |
| 10  | 902.44  | (b9 <sub>A</sub> B <sub>int</sub> ) <sup>+2</sup>  | 24  | 1451.21 | (A <sub>int</sub> b6 <sub>B</sub> ) <sup>+2</sup>  |
| 11  | 929.51  | y9 <sub>A</sub>                                    | 25  | 1454.78 | y14 <sub>A</sub>                                   |
| 12  | 967.82  | (y19 <sub>A</sub> B <sub>int</sub> ) <sup>+3</sup> | 26  | 1486.77 | (y20 <sub>A</sub> B <sub>int</sub> ) <sup>+2</sup> |
| 13  | 991.47  | (y20 <sub>A</sub> B <sub>int</sub> ) <sup>+3</sup> | 27  | 1803.87 | b9 <sub>A</sub> B <sub>int</sub>                   |
| 14  | 1028.58 | y10 <sub>A</sub>                                   |     |         |                                                    |



**Supplemental Figure 9. MS/MS Spectra of intra-molecular cross-linked peptides supporting a closed dimer conformation: G\*SM#EQFPK and FQSADE\*TGQDLVNANHEASDEVK with a precursor mass of 1151.5157/863.8886 and a charge state of +3/4.** See Supplemental Table 6 for the MS/MS assignments. Most ion assignments were made from GPMW and Fuzzy Ions.

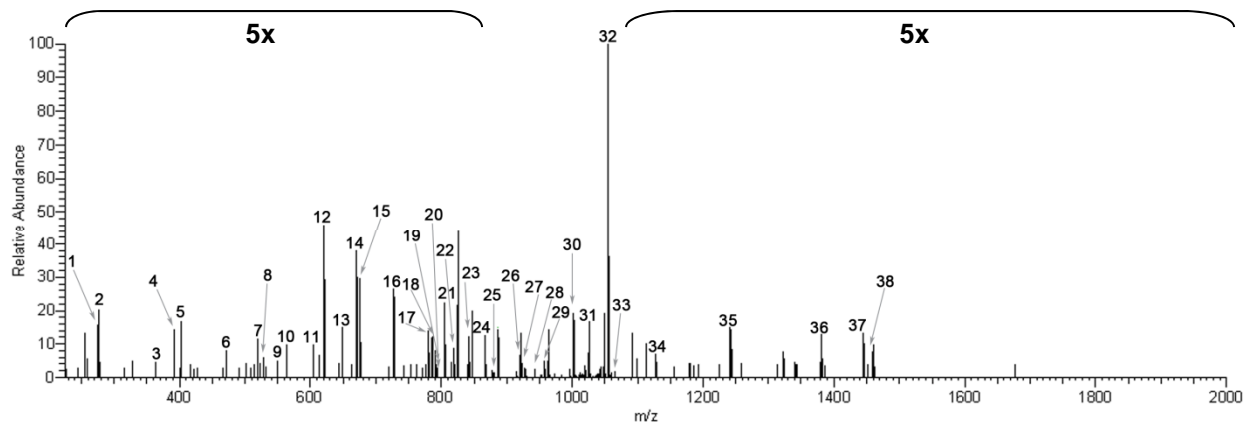

**Supplemental Table 6. MS/MS assignments for cross-linked peptide G\*SM#EQFPK and FQSADE\*TGQDLVNANHEASDEVK.** The MS/MS spectra is shown in Supplemental Fig 9.

| No. | Peaks  | Assignments                                        | No. | Peaks   | Assignments                                        |
|-----|--------|----------------------------------------------------|-----|---------|----------------------------------------------------|
| 1   | 274.19 | y2 <sub>A</sub>                                    | 20  | 791.87  | (b6 <sub>A</sub> B <sub>int</sub> ) <sup>+2</sup>  |
| 2   | 276.14 | b2 <sub>A</sub>                                    | 21  | 805.37  | y7 <sub>A</sub>                                    |
| 3   | 363.17 | b3 <sub>A</sub>                                    | 22  | 823.38  | (A <sub>int</sub> b7 <sub>B</sub> ) <sup>+4</sup>  |
| 4   | 391.24 | y3 <sub>B</sub>                                    | 23  | 842.37  | (b7 <sub>A</sub> B <sub>int</sub> ) <sup>+2</sup>  |
| 5   | 403.23 | y3 <sub>A</sub>                                    | 24  | 866.42  | y7 <sub>B</sub>                                    |
| 6   | 471.72 | (y8 <sub>B</sub> ) <sup>+2</sup>                   | 25  | 877.41  | (y16 <sub>A</sub> ) <sup>+2</sup>                  |
| 7   | 519.30 | y4 <sub>B</sub>                                    | 26  | 921.10  | (b17 <sub>A</sub> B <sub>int</sub> ) <sup>+3</sup> |
| 8   | 528.74 | (y9 <sub>A</sub> ) <sup>+2</sup>                   | 27  | 927.93  | (y17 <sub>A</sub> ) <sup>+2</sup>                  |
| 9   | 549.24 | b5 <sub>A</sub>                                    | 28  | 942.43  | y8 <sub>A</sub>                                    |
| 10  | 564.26 | (y10 <sub>A</sub> ) <sup>+2</sup>                  | 29  | 963.45  | (y18 <sub>A</sub> B <sub>int</sub> ) <sup>+3</sup> |
| 11  | 605.29 | y5 <sub>A</sub>                                    | 30  | 1002.12 | (y19 <sub>A</sub> B <sub>int</sub> ) <sup>+3</sup> |
| 12  | 621.28 | (y11 <sub>A</sub> ) <sup>+2</sup>                  | 31  | 1025.47 | (y20 <sub>A</sub> B <sub>int</sub> ) <sup>+3</sup> |
| 13  | 648.34 | y5 <sub>B</sub>                                    | 32  | 1055.15 | (y21 <sub>A</sub> B <sub>int</sub> ) <sup>+3</sup> |
| 14  | 670.81 | (y12 <sub>A</sub> ) <sup>+2</sup>                  | 33  | 1065.11 | (A <sub>int</sub> b6 <sub>B</sub> ) <sup>+3</sup>  |
| 15  | 676.33 | y6 <sub>A</sub>                                    | 34  | 1127.50 | y10 <sub>A</sub>                                   |
| 16  | 727.36 | (y13 <sub>A</sub> ) <sup>+2</sup>                  | 35  | 1241.55 | y11 <sub>A</sub>                                   |
| 17  | 779.39 | y6 <sub>B</sub>                                    | 36  | 1380.60 | (b17 <sub>A</sub> B <sub>int</sub> ) <sup>+2</sup> |
| 18  | 784.87 | (y14 <sub>A</sub> ) <sup>+2</sup>                  | 37  | 1445.13 | (y18 <sub>A</sub> ) <sup>+2</sup>                  |
| 19  | 791.61 | (b21 <sub>A</sub> B <sub>int</sub> ) <sup>+4</sup> | 38  | 1459.64 | (A <sub>int</sub> b4 <sub>B</sub> ) <sup>+2</sup>  |
